**RUNNING TITLE:** EA polygenic score, SES, and depression.

## **Educational Attainment Polygenic Score is Associated with Depressive Symptoms via Socioeconomic Status: A Gene-Environment-Trait Correlation**

Reut Avinun

*Department of Psychology & Neuroscience, Duke University, Durham, NC, USA and the Department of Psychology, The Hebrew University of Jerusalem, Jerusalem, Israel*

Corresponding Author: Reut Avinun, Ph.D., Department of Psychology, The Hebrew University of Jerusalem, Mount Scopus, Jerusalem, 91905 Israel. Email: [reut.avinun@mail.huji.ac.il](mailto:reut.avinun@mail.huji.ac.il)

## Abstract

Recently, I suggested that the environment can act as a mediator of genetic influences in a process termed Gene-Environment-Trait correlations (rGET). I further hypothesized that socioeconomic status (SES) may mediate the negative genetic correlation found between cognitive ability and depression. This hypothesis was based on previous research showing that SES is associated with both cognitive ability and depression. Thus, in the current study I aimed to test for an rGET in which genetic influences on cognitive ability were associated with depressive symptoms via SES. Educational attainment (EA) was used as a proxy for cognitive ability, due to the high genetic correlation between the phenotypes and the highly powerful genome-wide association study (GWAS) available for EA. Summary statistics from the EA GWAS were utilized to calculate EA polygenic scores, and mediation analyses were performed to examine if the EA polygenic scores predicted depressive symptoms via SES. Two independent samples were used for the analyses: 522 non-Hispanic Caucasian university students from the Duke Neurogenetics Study (DNS; 277 women, mean age  $19.78 \pm 1.24$  years) and 5,243 white British volunteers (2,669 women, mean age  $62.30 \pm 7.41$  years) from the UK biobank (UKB). Results indicated a significant mediation in both samples, wherein higher EA polygenic scores predicted higher SES, which in turn predicted lower depressive symptoms. Current findings suggest that some of the genetic correlates of depression represent environmental influences and consequently that public policy aiming to reduce socioeconomic inequalities may not only relieve the individual and societal burden of depression, but also decrease the genetic risk for depression.

**Keywords:** Depression; Socioeconomic status (SES); Educational attainment (EA); Gene-environment-trait correlation (rGET); Gene-environment-correlation (rGE); polygenic score.

1 Depression is a major cause of disability. It has a global prevalence of around 4.7%  
2 (Ferrari et al., 2013), and it is predicted to become one of the three leading causes of  
3 illness by 2030 (Mathers & Loncar, 2006). Interestingly, low cognitive ability in  
4 childhood has been shown to predict high levels of depression (e.g., Hung et al., 2016;  
5 Leech, Larkby, Day, & Day, 2006). Educational attainment (EA), which is often used  
6 as a proxy for cognitive ability, has been also linked to depression, so that the  
7 probability of experiencing depression decreases for additional years of education  
8 (Crespo, López-Noval, & Mira, 2014). Recent studies have found negative genetic  
9 associations between depression and both cognitive ability (Savage et al., 2018) and  
10 EA (Wray et al., 2018). Furthermore, by employing a genetically informed analysis  
11 (Mendelian randomization), both low cognitive ability and low EA were marked as  
12 risk factors for depression (Davies et al., 2019; Wray et al., 2018). Notably, how the  
13 genetic correlation between cognitive ability and depression is mediated has not been  
14 established.

15       Recently, I suggested that socioeconomic status may act as a mediator of the  
16 genetic link between cognitive ability and depression (Avinun, 2020). More generally,  
17 I hypothesized that the environment may mediate genetic correlations between two  
18 different phenotypes in a process termed gene-environment-trait correlations (Avinun,  
19 2020). This hypothesis stemmed from accumulating research showing passive, active,  
20 and evocative processes that lead to correlations between genetic variations and  
21 environmental measures, such as parenting and stressful life events (Avinun & Knafo,  
22 2014; Kendler & Baker, 2007). These passive, active, and evocative processes, known  
23 as gene-environment correlations (Plomin, DeFries, & Loehlin, 1977; Scarr &  
24 McCartney, 1983), occur due to genetically influenced characteristics that shape the  
25 individual's environment. As the environment can in turn substantially affect various

26 outcomes, it may act as a mediator of genetic effects and contribute to the widespread  
27 genetic correlations observed between numerous phenotypes (Bulik-Sullivan et al.,  
28 2015), including between depression and both cognitive ability and EA (Savage et al.,  
29 2018; Wray et al., 2018). Identifying gene-environment-depression correlations can  
30 provide modifiable targets for public policy and also demonstrate the importance of  
31 context in the discovery of the genetic variants that influence depression.

32 SES, which can be defined as an individual's or group's position within a social  
33 hierarchy that is determined by factors such as education, occupation, income, and  
34 wealth (Calixto & Anaya, 2014), has been shown to be genetically influenced (Hill et  
35 al., 2016; Marioni et al., 2014). In other words, genetically influenced traits affect an  
36 individual's SES. One of these traits, as has been found in a meta-analysis of  
37 longitudinal studies, is cognitive ability (Strenze, 2007), which is highly heritable  
38 (Plomin & Deary, 2015). SES has been associated with various physiological and  
39 mental disorders (e.g., Calixto & Anaya, 2014; Galobardes, Lynch, & Davey Smith,  
40 2004; Werner, Malaspina, & Rabinowitz, 2007), including depression (Everson,  
41 Maty, Lynch, & Kaplan, 2002), and a genetic correlation between SES and depression  
42 has been also observed (Hill et al., 2016).

43 Based on the above I set out to test for a gene-environment-trait correlation in  
44 which SES mediates an association between a cognitive ability polygenic score and  
45 depression. As findings of a recent genome wide association study (GWAS) of  
46 cognitive ability were only able to explain 5.2% of the variance in this phenotype, I  
47 chose to use the GWAS of EA (Lee et al., 2018), which included 1.1 million  
48 European-descent participants, and produced a polygenic score that explained ~11%  
49 of the variance in EA. The use of EA as a proxy for cognitive ability due to their high  
50 phenotypic and genetic correlation (a single nucleotide polymorphism-based genetic

51 correlation of .95; Marioni et al., 2014), has been previously done to increase  
52 statistical power (e.g., Hill et al., 2019). Two independent samples were used: a  
53 sample of 522 non-Hispanic Caucasian university students from the Duke  
54 Neurogenetics Study and a sample of 5,243 adult white British volunteers from the  
55 UK Biobank (UKB). Because the GWAS included data from the UKB and this may  
56 bias the results, even though a different outcome is tested, in the analyses of the UKB  
57 data EA polygenic scores that were based on summary statistics from a GWAS that  
58 did not include the UKB as a discovery sample, were used (obtained from Dr. Aysu  
59 Okbay, who is one of the authors of the original GWAS).

60

61

## Materials and Methods

### *Participants*

62  
63 The Duke Neurogenetics Study (DNS) sample consisted of 522 self-reported non-  
64 Hispanic Caucasian participants (277 women, mean age  $19.78 \pm 1.24$  years) who were  
65 not related and for whom there was complete data on genotypes, SES, depressive  
66 symptoms, and all covariates. Participants were recruited through posted flyers on the  
67 Duke University campus and through a Duke University listserv. All procedures were  
68 approved by the Institutional Review Board of the Duke University Medical Center,  
69 and participants provided informed consent before study initiation. All participants  
70 were free of the following study exclusions: 1) medical diagnoses of cancer, stroke,  
71 diabetes requiring insulin treatment, chronic kidney or liver disease, or lifetime  
72 history of psychotic symptoms; 2) use of psychotropic, glucocorticoid, or  
73 hypolipidemic medication; and 3) conditions affecting cerebral blood flow and  
74 metabolism (e.g., hypertension).

75           The UKB sample consisted of 5,243 white British volunteers (2,669 women,  
76   mean age  $62.30 \pm 7.41$  years), who participated in the UKB's first assessment and the  
77   imaging wave, completed an online mental health questionnaire (Davis et al., 2018),  
78   and had complete genotype, SES, depressive symptoms and covariate data. The UKB  
79   ([www.ukbiobank.ac.uk](http://www.ukbiobank.ac.uk); Sudlow et al., 2015) includes over 500,000 participants,  
80   between the ages of 40 and 69 years, who were recruited within the UK between 2006  
81   and 2010. The UKB study was approved by the National Health Service Research  
82   Ethics Service (reference: 11/NW/0382), and current analyses were conducted under  
83   UKB application 28174 (because the application also included a request for  
84   neuroimaging data, the sample used in this study is limited to individuals who  
85   participated in the imaging wave).

86

### 87   *Ancestry*

88   Because self-reported race and ethnicity are not always an accurate reflection of  
89   genetic ancestry, an analysis of identity by state of whole-genome SNPs in the DNS  
90   was performed in PLINK v1.9 (Purcell et al., 2007). Before running the  
91   multidimensional scaling (MDS) components analysis, SNPs were pruned for high  
92   LD ( $r^2 > 0.1$ ), and the following were removed: C/G and A/T SNPs, SNPs with a  
93   missing rate  $> .05$  or a minor allele frequency  $< .01$ , SNPs that did not pass the Hardy-  
94   Weinberg equilibrium test ( $p < 1e-6$ ), sex chromosomes, and regions with long range  
95   LD (the MHC and 23 additional regions; Price et al., 2008). The first two MDS  
96   components computed for the non-Hispanic Caucasian subgroup, as determined by  
97   both self-reports and the MDS components of the entire mixed race/ethnicity DNS  
98   sample, were used as covariates in analyses of data from the DNS. The decision to use  
99   only the first two MDS components was based on an examination of a scree plot of

100 eigenvalues, which became very similar after the second MDS component (additional  
101 information and plots are available at  
102 <https://www.haririlab.com/methods/genetics.html>).

103 For analyses of data from the UKB, only those who were ‘white British’ based  
104 on both self-identification and a genetic principal components analysis were included.  
105 Additionally, the first 10 principal components received from the UKB's data  
106 repository (unique data identifiers: 22009-0.1-22009-0.10) were included as  
107 covariates as previously done (e.g., Avinun & Hariri, 2019; Whalley et al., 2016).  
108 Further details on the computation of the principal components can be found  
109 elsewhere ([http://www.ukbiobank.ac.uk/wp-](http://www.ukbiobank.ac.uk/wp-content/uploads/2014/04/UKBiobank_genotyping_QC_documentation-web.pdf)  
110 [content/uploads/2014/04/UKBiobank\\_genotyping\\_QC\\_documentation-web.pdf](http://www.ukbiobank.ac.uk/wp-content/uploads/2014/04/UKBiobank_genotyping_QC_documentation-web.pdf)).

111

### 112 *Socioeconomic status*

113 In the DNS, SES was assessed using the "social ladder" instrument (Adler, Epel,  
114 Castellazzo, & Ickovics, 2000), which asks participants to rank themselves relative to  
115 other people in the United States (or their origin country) on a scale from 0–10, with  
116 people who are best off in terms of money, education, and respected jobs, at the top  
117 (10) and people who are worst off at the bottom (0). The participants were also asked  
118 to rate their parents' SES during their childhood and adolescence. The correlation  
119 between the participants' SES and their mothers' SES was .50, and the correlation  
120 between the participants' SES and their fathers' SES was .49. Only the participants  
121 own SES was used.

122 In the UKB, SES was assessed based on the report of average household income  
123 before tax, coded as: 1 - Less than 18,000; 2 - 18,000 to 31,000; 3 - 31,000 to 52,000;  
124 4 - 52,000 to 100,000; and 5 - Greater than 100,000. The reports made during the first



125 assessment (i.e., before the evaluation of depressive symptoms), between 2006 and  
126 2010, were used.

127

### 128 *Depressive symptoms*

129 In the DNS, the 20-item Center for Epidemiologic Studies Depression Scale (CES-D)  
130 was used to assess depressive symptoms in the past week (Radloff, 1977). All items  
131 were summed to create a total depressive symptoms score.

132 In the UKB, the Patient Health Questionnaire 9-question version (PHQ-9) was  
133 used to assess depressive symptoms in the past 2 weeks (Kroenke, Spitzer, &  
134 Williams, 2001). The participants answered these questions during a follow-up  
135 between 2016 and 2017. All items were summed to create a total depressive  
136 symptoms score.

137

### 138 *Genotyping*

139 In the DNS, DNA was isolated from saliva using Oragene DNA self-collection kits  
140 (DNA Genotek) customized for 23andMe ([www.23andme.com](http://www.23andme.com)). DNA extraction and  
141 genotyping were performed through 23andMe by the National Genetics Institute  
142 (NGI), a CLIA-certified clinical laboratory and subsidiary of Laboratory Corporation  
143 of America. One of two different Illumina arrays with custom content was used to  
144 provide genome-wide SNP data, the HumanOmniExpress (N=328) or  
145 HumanOmniExpress-24 (N=194; Do et al., 2011; Eriksson et al., 2010; Tung et al.,  
146 2011). In the UKB, samples were genotyped using either the UK BiLEVE (N=501)  
147 or the UKB axiom (N=4,742) array. Details regarding the UKB's quality control can  
148 be found elsewhere (Bycroft et al., 2017).

149

150 *Quality control and polygenic scoring*

151 For genetic data from both the DNS and UKB, PLINK v1.90 (Purcell et al., 2007) was  
152 used to apply quality control cutoffs and exclude SNPs or individuals based on the  
153 following criteria: missing genotype rate per individual  $>.10$ , missing rate per SNP  
154  $>.10$ , minor allele frequency  $<.01$ , and Hardy-Weinberg equilibrium  $p < 1e-6$ .  
155 Additionally, in the UKB, quality control variables that were provided with the  
156 dataset were used to exclude participants based on a sex mismatch (genetic sex  
157 different from reported sex), a genetic relationship to another participant, outliers for  
158 heterozygosity or missingness (unique Data Identifier 22010-0.0), and UKBiLEVE  
159 genotype quality control for samples (unique Data Identifiers 22050-0.0-22052-0.0).

160 Polygenic scores were calculated using PLINK's (Purcell et al., 2007) "--score"  
161 command based on published SNP-level summary statistics from the most recent EA  
162 GWAS (Lee et al., 2018). Published summary statistics do not include the data from  
163 23andMe per the requirements of this company (i.e.,  $N \approx 766,345$ ). For the UKB  
164 analyses, summary scores from a GWAS that did not include the UKB as a discovery  
165 sample were used ( $N \approx 324,162$ ). SNPs from the GWAS of EA were matched with  
166 SNPs from the DNS and the UKB. For each SNP the number of the alleles (0, 1, or 2)  
167 associated with EA was multiplied by the effect estimated in the GWAS. The  
168 polygenic score for each individual was an average of weighted EA-associated alleles.  
169 All SNPs matched with SNPs from the DNS and UKB were used regardless of effect  
170 size and significance in the original GWAS, as previously recommended and shown  
171 to be effective (Dudbridge, 2013; Ware et al., 2017).

172

173 *Statistical analysis*

174 The PROCESS SPSS macro, version 3.1 (Hayes, 2017), was used to conduct the  
175 mediation analyses in SPSS version 26. Participants' sex (coded as 0=males,  
176 1=females), age, and ancestry (two genetic components for the DNS and 10 for the  
177 UK biobank) were entered as covariates in all analyses. In the mediation analyses,  
178 bias-corrected bootstrapping (set to 5,000) was used to allow for non-symmetric 95%  
179 confidence intervals (CIs). Specifically, indirect effects are likely to have a non-  
180 normal distribution, and consequently the use of non-symmetric CIs for the  
181 determination of significance is recommended (MacKinnon, Lockwood, & Williams,  
182 2004). However, bias-corrected bootstrapping also has its faults (Hayes & Scharkow,  
183 2013) and, consequently, as supportive evidence for the indirect effect, I also present  
184 the test of joint significance, which examines whether the *a path* (EA polygenic  
185 scores to SES) and the *b path* (SES to depressive symptoms, while controlling for the  
186 EA polygenic scores) are significant. The EA polygenic scores were standardized  
187 (i.e., M=0, SD=1) in SPSS to make interpretability easier.

188 As a post-hoc analysis, in the UKB it was possible to analyze the longitudinal  
189 data while excluding those who reported on ever seeing a general physician  
190 (N=1,843) or a psychiatrist (N=501) "for nerves, anxiety, tension or depression", at  
191 the first assessment.

192

193

## Results

194 *Descriptive statistics*

195 In the DNS, the SES measure ranged between 2 and 10 (M=7.34, SD=1.43) and  
196 depressive symptoms ranged between 0 and 43 (M=8.94, SD=7.13). In the UKB, the  
197 SES measure ranged between 1 and 5 (M=2.92, SD=1.11), and depressive symptoms,  
198 estimated about 6 years later, ranged between 0 and 27 (M=2.50, SD=3.43).

199

200 *EA polygenic scores and SES (a path) in the DNS*

201 The EA polygenic scores were significantly associated with SES ( $b=.20$ ,  $SE=.06$ ,  
202  $p=.0016$ ;  $R^2=0.018$ ), so that higher scores predicted higher SES. Of the covariates,  
203 age and sex were significantly associated with SES, so that older participants ( $b=.13$ ,  
204  $SE=.05$ ,  $p=.008$ ) and men ( $b=-.45$ ,  $SE=.12$ ,  $p=.0003$ ) were characterized by higher  
205 SES.

206

207 *SES and depressive symptoms (b path) in the DNS*

208 With the EA polygenic scores in the model, SES significantly and negatively  
209 predicted depressive symptoms ( $b=-.61$ ,  $SE=.22$ ,  $p=.007$ ;  $R^2=0.014$ ), such that higher  
210 SES predicted lower depressive symptoms. Of the covariates, age was significantly  
211 associated with depressive symptoms, so that being younger was associated with  
212 higher depressive symptoms ( $b=-.53$ ,  $SE=.25$ ,  $p=.037$ ).

213

214 *EA polygenic scores and depressive symptoms in the DNS*

215 The EA polygenic scores did not significantly predict depressive symptoms ( $b=-.11$ ,  
216  $SE=.32$ ,  $p=.74$ ). Notably, however, the significance of a direct path from X (EA  
217 polygenic scores) to Y (depressive symptoms) or the 'total effect' (the 'c' path), is not a  
218 prerequisite for the testing of a mediation/indirect effect (Hayes, 2009; MacKinnon,  
219 Krull, & Lockwood, 2000; Rucker, Preacher, Tormala, & Petty, 2011), which was the  
220 main interest of the current study.

221

222 *Indirect Effects in the DNS*

223 The indirect path ( $a*b$ ), EA polygenic scores to depressive symptoms via SES was  
224 significant as indicated by the bias corrected bootstrapped 95% CI not including zero  
225 (Figure 1a; indirect effect=-.12, bootstrapped SE=.06, bootstrapped 95% CI: -.26 to -  
226 .02). The indirect effect remained significant when 10 MDS components of genetic  
227 ancestry and genotyping platform were included as covariates (indirect effect=-.12,  
228 bootstrapped SE=.06, bootstrapped 95% CI: -.27 to -.02).

229

### 230 *Indirect Effects in the UKB*

231 For the UKB, EA polygenic scores that were based on a GWAS that did not include  
232 the UKB as a discovery sample, were used. additionally, genotyping platform was  
233 included as a covariate in the analyses. The *a path*, from the EA polygenic scores to  
234 SES, and the *b path*, from SES to depressive symptoms while controlling for EA  
235 polygenic scores, were significant (*a path*:  $b=.10$ ,  $SE=.01$ ,  $p<.0001$ ,  $R^2=0.008$ ; *b path*:  
236  $b=-.43$ ,  $SE=.04$ ,  $p<.0001$ ,  $R^2=0.017$ ). The indirect path was also significant (Figure  
237 1b; indirect effect=-.04, bootstrapped SE=.008, bootstrapped 95% CI: -.06 to -.03).

238 To test the robustness of the finding, a post-hoc analysis that excluded  
239 participants who, at the first assessment, reported on ever seeing a professional for  
240 nerves or depression (leaving 3,447 participants), was conducted. This was done in an  
241 attempt to increase the likelihood of only including the individuals who became  
242 depressed between the first assessment, in which income was assessed, and the  
243 assessment a few years later, in which depressive symptoms were assessed. This  
244 analysis further supported a causal mediation, in which higher EA polygenic scores  
245 predicted higher SES, which in turn predicted lower depressive symptoms (*a path*:  
246  $b=.08$ ,  $SE=.02$ ,  $p<.0001$ ,  $R^2=0.005$ ; *b path*:  $b=-.15$ ,  $SE=.04$ ,  $p=.0003$ ,  $R^2=0.004$ ;  
247 indirect effect=-.012, bootstrapped SE=.004, bootstrapped 95% CI: -.022 to -.005).

248

249

## Discussion

250 The current results suggest that the negative genetic link previously found between  
251 cognitive ability and depressive symptoms may be partly mediated by SES. EA was  
252 used in the current study as a proxy for cognitive ability, due to the high phenotypic  
253 and genetic correlation between them (a single nucleotide polymorphism-based  
254 genetic correlation of .95; Marioni et al., 2014) and the highly powerful GWAS  
255 available for EA. The indirect effect was found in two independent samples with  
256 different characteristics and measures, demonstrating the robustness of the  
257 associations. Notably, in the UKB the indirect effect was tested longitudinally, with  
258 data on SES that was collected about 6 years before the assessment of depressive  
259 symptoms. A supplementary analysis that excluded participants who reported ever  
260 seeing a professional for nerves or depression at first assessment, was also significant,  
261 further supporting a causal temporal mediation.

262 The found mediation supports the gene-environment-trait correlations  
263 hypothesis (rGET; Avinun, 2020), which suggests that certain genetic correlations  
264 may be mediated, at least in part, by the environment, i.e., an environmentally  
265 mediated pleiotropy. The found EA polygenic scores → SES → depressive symptoms  
266 mediation stresses the importance of context in genetic studies of depression. More  
267 specifically, the current results suggest that a GWAS of depression that relies mostly  
268 on a sample that is homogeneous in terms of SES, will be less likely to capture the  
269 genetic influences that contribute to depression via SES. Consequently, polygenic  
270 scores that will be based on such a GWAS may be weaker predictors of depression.  
271 Put differently, because the environment can act as a mediator of some of the genetic  
272 influences on depression, if the environment differs between GWASs, the captured

273 genetic influences will differ. Importantly, the current results imply that social  
274 policies aimed at reducing socioeconomic inequalities may weaken the genetic effects  
275 on depression by decreasing the association between cognitive ability and depression.  
276 Lastly, this rGET means that statistically controlling for SES may help to remove  
277 environmentally mediated effects from the depression polygenic score and lead us a  
278 step closer to identifying the direct genetic influences on depression.

279         Low SES may be a risk factor for depression by leading to an increase in life  
280 stress that stems from having to make ends meet and from living in a disadvantaged  
281 neighborhood, which is associated with higher crime and fewer resources (Santiago,  
282 Wadsworth, & Stump, 2011). Low SES has also been associated with poorer access to  
283 green spaces (Dai, 2011), and with health damaging behaviors, such as physical  
284 inactivity, higher alcohol consumption, and poor nutrition (Nandi, Glymour, &  
285 Subramanian, 2014; Pampel, Krueger, & Denney, 2010), which are thought to affect  
286 mental health (e.g., Avinun & Hariri, 2019; Beyer et al., 2014; Boden & Fergusson,  
287 2011). All of these mediators can be possible targets for policy makers.

288         The strengths of the current study include the use of two independent samples  
289 with markedly different measures and characteristics (e.g., young university students  
290 versus older community volunteers) and a GWAS-derived polygenic score, but it is  
291 also limited in ways that can be addressed in future studies. First, the findings are  
292 limited to populations of European descent and to the Western culture. Second, both  
293 samples consisted of volunteers and consequently do not fully represent the general  
294 population. However, it may be speculated that the observed associations would  
295 strengthen with the inclusion of more individuals from low SES backgrounds, which  
296 are usually characterized by higher levels of depression (Lorant et al., 2003). Third,

297 the mediation model should be replicated within longitudinal designs in which  
298 measures of SES and depressive symptoms are available at multiple time points.

299 In conclusion, the current results shed light on the genetic associations that have  
300 been observed between cognitive ability and depression (Savage et al., 2018), and  
301 suggest that they are partly mediated by SES. The mediation by SES is important  
302 because it suggests that the genetic influences on depression may be moderated by  
303 public policy and that the genetic composition of depression is likely to depend on the  
304 social context in which it is examined. Additionally, the current results suggest that  
305 controlling for SES, or other environmental factors that can act as mediators of  
306 genetic influences, can help to isolate the direct genetic influences on depression.

307

### 308 **Acknowledgements**

309 I would like to thank the participants of the Duke Neurogenetics Study and the  
310 members of the Laboratory of NeuroGenetics, especially Annchen R. Knodt, Spenser  
311 R. Radtke, and Bartholomew D. Brigidi for their assistance with data collection and  
312 analysis. I would also like to thank the head of the laboratory, Prof. Ahmad Hariri,  
313 without whom this study would not have been possible. Lastly, I would like to thank  
314 Dr. Aysu Okbay for her help with obtaining a GWAS of educational attainment that  
315 did not include UK biobank data.

316

### 317 **Funding**

318 The DNS was supported by Duke University as well as US-National Institutes of  
319 Health grant R01DA033369. The author received support from a fellowship from the  
320 Jerusalem Brain Community.

321



322 **Conflict of Interest**

323 The author declares no competing financial or other interests.

324

325

326

## References

- 327 Adler, N. E., Epel, E. S., Castellazzo, G., & Ickovics, J. R. (2000). Relationship of  
328 subjective and objective social status with psychological and physiological  
329 functioning: Preliminary data in healthy, White women. *Health Psychology*,  
330 *19*(6), 586.
- 331 Avinun, R. (2020). The E is in the G: Gene-Environment-Trait Correlations and  
332 Findings from Genome-Wide Association Studies. *Perspectives on*  
333 *Psychological Science*, *15*(1), 81-89. doi: 10.1177/1745691619867107
- 334 Avinun, R., & Hariri, A. R. (2019). A Polygenic Score for Body Mass Index is  
335 Associated with Depressive Symptoms via Early Life Stress: Evidence for  
336 Gene-Environment Correlation. *Journal of Psychiatric Research*, *118*, 9-13.  
337 doi: 10.1016/j.jpsychires.2019.08.008
- 338 Avinun, R., & Knafo, A. (2014). Parenting as a Reaction Evoked by Children's  
339 Genotype A Meta-Analysis of Children-as-Twins Studies. *Personality and*  
340 *Social Psychology Review*, *18*(1), 87-102.
- 341 Beyer, K., Kaltenbach, A., Szabo, A., Bogar, S., Nieto, F., & Malecki, K. (2014).  
342 Exposure to neighborhood green space and mental health: evidence from the  
343 survey of the health of Wisconsin. *International Journal of Environmental*  
344 *Research and Public Health*, *11*(3), 3453-3472.
- 345 Boden, J. M., & Fergusson, D. M. (2011). Alcohol and depression. *Addiction*, *106*(5),  
346 906-914.
- 347 Bulik-Sullivan, B., Finucane, H. K., Anttila, V., Gusev, A., Day, F. R., Loh, P.-R., . . .  
348 Robinson, E. B. (2015). An atlas of genetic correlations across human diseases  
349 and traits. *Nature Genetics*, *47*(11), 1236.

- 350 Bycroft, C., Freeman, C., Petkova, D., Band, G., Elliott, L. T., Sharp, K., . . .  
351 O'Connell, J. (2017). Genome-wide genetic data on~ 500,000 UK Biobank  
352 participants. *bioRxiv*, 166298.
- 353 Calixto, O.-J., & Anaya, J.-M. (2014). Socioeconomic status. The relationship with  
354 health and autoimmune diseases. *Autoimmunity Reviews*, *13*(6), 641-654.
- 355 Crespo, L., López-Noval, B., & Mira, P. (2014). Compulsory schooling, education,  
356 depression and memory: New evidence from SHARELIFE. *Economics of*  
357 *Education Review*, *43*, 36-46.
- 358 Dai, D. (2011). Racial/ethnic and socioeconomic disparities in urban green space  
359 accessibility: Where to intervene? *Landscape and Urban Planning*, *102*(4),  
360 234-244.
- 361 Davies, N. M., Hill, W. D., Anderson, E. L., Sanderson, E., Deary, I. J., & Smith, G.  
362 D. (2019). Multivariable two-sample Mendelian randomization estimates of  
363 the effects of intelligence and education on health. *eLife*, *8*.
- 364 Davis, K. A., Coleman, J. R., Adams, M., Allen, N., Breen, G., Cullen, B., . . .  
365 Holliday, J. (2018). Mental health in UK Biobank: development,  
366 implementation and results from an online questionnaire completed by 157  
367 366 participants. *BJPsych Open*, *4*(3), 83-90.
- 368 Do, C. B., Tung, J. Y., Dorfman, E., Kiefer, A. K., Drabant, E. M., Francke, U., . . .  
369 Langston, J. W. (2011). Web-based genome-wide association study identifies  
370 two novel loci and a substantial genetic component for Parkinson's disease.  
371 *PLoS Genetics*, *7*(6), e1002141.
- 372 Dudbridge, F. (2013). Power and predictive accuracy of polygenic risk scores. *PLoS*  
373 *Genetics*, *9*(3), e1003348.

- 374 Eriksson, N., Macpherson, J. M., Tung, J. Y., Hon, L. S., Naughton, B., Saxonov, S., .  
375 . . Mountain, J. (2010). Web-based, participant-driven studies yield novel  
376 genetic associations for common traits. *PLoS Genetics*, 6(6), e1000993.
- 377 Everson, S. A., Maty, S. C., Lynch, J. W., & Kaplan, G. A. (2002). Epidemiologic  
378 evidence for the relation between socioeconomic status and depression,  
379 obesity, and diabetes. *Journal of Psychosomatic Research*, 53(4), 891-895.
- 380 Ferrari, A., Somerville, A., Baxter, A., Norman, R., Patten, S., Vos, T., & Whiteford,  
381 H. (2013). Global variation in the prevalence and incidence of major  
382 depressive disorder: a systematic review of the epidemiological literature.  
383 *Psychological medicine*, 43(3), 471-481.
- 384 Galobardes, B., Lynch, J. W., & Davey Smith, G. (2004). Childhood socioeconomic  
385 circumstances and cause-specific mortality in adulthood: systematic review  
386 and interpretation. *Epidemiologic Reviews*, 26(1), 7-21.
- 387 Hayes, A. F. (2009). Beyond Baron and Kenny: Statistical mediation analysis in the  
388 new millennium. *Communication monographs*, 76(4), 408-420.
- 389 Hayes, A. F. (2017). *Introduction to mediation, moderation, and conditional process*  
390 *analysis: A regression-based approach*: Guilford Publications.
- 391 Hayes, A. F., & Scharkow, M. (2013). The relative trustworthiness of inferential tests  
392 of the indirect effect in statistical mediation analysis: Does method really  
393 matter? *Psychological Science*, 24(10), 1918-1927.
- 394 Hill, W., Marioni, R., Maghzian, O., Ritchie, S., Hagenaars, S., McIntosh, A., . . .  
395 Deary, I. (2019). A combined analysis of genetically correlated traits identifies  
396 187 loci and a role for neurogenesis and myelination in intelligence.  
397 *Molecular Psychiatry*, 24(2), 169-181.

- 398 Hill, W. D., Hagenaars, S. P., Marioni, R. E., Harris, S. E., Liewald, D. C., Davies,  
399 G., . . . Deary, I. J. (2016). Molecular genetic contributions to social  
400 deprivation and household income in UK Biobank. *Current Biology*, 26(22),  
401 3083-3089.
- 402 Hung, G. C.-L., Pietras, S. A., Carliner, H., Martin, L., Seidman, L. J., Buka, S. L., &  
403 Gilman, S. E. (2016). Cognitive ability in childhood and the chronicity and  
404 suicidality of depression. *The British Journal of Psychiatry*, 208(2), 120-127.
- 405 Kendler, K. S., & Baker, J. H. (2007). Genetic influences on measures of the  
406 environment: a systematic review. *Psychological Medicine*, 37(5), 615-626.
- 407 Kroenke, K., Spitzer, R. L., & Williams, J. B. (2001). The PHQ-9: validity of a brief  
408 depression severity measure. *Journal of General Internal Medicine*, 16(9),  
409 606-613.
- 410 Lee, J., Wedow, R., Okbay, A., Kong, E., Maghzian, O., Zacher, M., . . . Karlsson, L.  
411 R. (2018). Gene discovery and polygenic prediction from a genome-wide  
412 association study of educational attainment in 1.1 million individuals. *Nature*  
413 *Genetics*, 50(8), 1112–1121.
- 414 Leech, S. L., Larkby, C. A., Day, R., & Day, N. L. (2006). Predictors and correlates of  
415 high levels of depression and anxiety symptoms among children at age 10.  
416 *Journal of the American Academy of Child and Adolescent Psychiatry*, 45(2),  
417 223-230.
- 418 Lorant, V., Deliège, D., Eaton, W., Robert, A., Philippot, P., & Ansseau, M. (2003).  
419 Socioeconomic inequalities in depression: a meta-analysis. *American Journal*  
420 *of Epidemiology*, 157(2), 98-112.

- 421 MacKinnon, D. P., Krull, J. L., & Lockwood, C. M. (2000). Equivalence of the  
422 mediation, confounding and suppression effect. *Prevention Science, 1*(4), 173-  
423 181.
- 424 MacKinnon, D. P., Lockwood, C. M., & Williams, J. (2004). Confidence Limits for  
425 the Indirect Effect: Distribution of the Product and Resampling Methods.  
426 *Multivariate Behavioral Research, 39*(1), 99.
- 427 Marioni, R. E., Davies, G., Hayward, C., Liewald, D., Kerr, S. M., Campbell, A., . . .  
428 Hocking, L. J. (2014). Molecular genetic contributions to socioeconomic  
429 status and intelligence. *Intelligence, 44*, 26-32.
- 430 Mathers, C. D., & Loncar, D. (2006). Projections of global mortality and burden of  
431 disease from 2002 to 2030. *PLOS Medicine, 3*(11), e442.
- 432 Nandi, A., Glymour, M. M., & Subramanian, S. (2014). Association among  
433 socioeconomic status, health behaviors, and all-cause mortality in the United  
434 States. *Epidemiology, 25*(2), 170-177.
- 435 Pampel, F. C., Krueger, P. M., & Denney, J. T. (2010). Socioeconomic disparities in  
436 health behaviors. *Annual review of sociology, 36*, 349-370.
- 437 Plomin, R., & Deary, I. J. (2015). Genetics and intelligence differences: five special  
438 findings. *Molecular Psychiatry, 20*(1), 98.
- 439 Plomin, R., DeFries, J. C., & Loehlin, J. C. (1977). Genotype-environment interaction  
440 and correlation in the analysis of human behavior. *Psychological Bulletin,*  
441 *84*(2), 309-322.
- 442 Price, A. L., Weale, M. E., Patterson, N., Myers, S. R., Need, A. C., Shianna, K. V., . . .  
443 . Taylor, K. D. (2008). Long-range LD can confound genome scans in  
444 admixed populations. *The American Journal of Human Genetics, 83*(1), 132-  
445 135.

- 446 Purcell, S., Neale, B., Todd-Brown, K., Thomas, L., Ferreira, M. A., Bender, D., . . .  
447       Daly, M. J. (2007). PLINK: a tool set for whole-genome association and  
448       population-based linkage analyses. *The American Journal of Human Genetics*,  
449       81(3), 559-575.
- 450 Radloff, L. S. (1977). The CES-D scale: A self-report depression scale for research in  
451       the general population. *Applied psychological measurement*, 1(3), 385-401.
- 452 Rucker, D. D., Preacher, K. J., Tormala, Z. L., & Petty, R. E. (2011). Mediation  
453       analysis in social psychology: Current practices and new recommendations.  
454       *Social and Personality Psychology Compass*, 5(6), 359-371.
- 455 Santiago, C. D., Wadsworth, M. E., & Stump, J. (2011). Socioeconomic status,  
456       neighborhood disadvantage, and poverty-related stress: Prospective effects on  
457       psychological syndromes among diverse low-income families. *Journal of*  
458       *Economic Psychology*, 32(2), 218-230.
- 459 Savage, J. E., Jansen, P. R., Stringer, S., Watanabe, K., Bryois, J., De Leeuw, C. A., . . .  
460       . Coleman, J. R. (2018). Genome-wide association meta-analysis in 269,867  
461       individuals identifies new genetic and functional links to intelligence. *Nature*  
462       *Genetics*, 50(7), 912-919.
- 463 Scarr, S., & McCartney, K. (1983). How people make their own environments: A  
464       theory of genotype environment effects. *Child Development*, 54(2), 424-435.
- 465 Strenze, T. (2007). Intelligence and socioeconomic success: A meta-analytic review  
466       of longitudinal research. *Intelligence*, 35(5), 401-426.
- 467 Sudlow, C., Gallacher, J., Allen, N., Beral, V., Burton, P., Danesh, J., . . . Landray, M.  
468       (2015). UK biobank: an open access resource for identifying the causes of a  
469       wide range of complex diseases of middle and old age. *PLoS Medicine*, 12(3),  
470       e1001779.

- 471 Tung, J. Y., Do, C. B., Hinds, D. A., Kiefer, A. K., Macpherson, J. M., Chowdry, A.  
472 B., . . . Wojcicki, A. (2011). Efficient replication of over 180 genetic  
473 associations with self-reported medical data. *PLoS ONE*, 6(8), e23473.
- 474 Ware, E. B., Schmitz, L. L., Faul, J. D., Gard, A., Mitchell, C., Smith, J. A., . . .  
475 Kardia, S. L. (2017). Heterogeneity in polygenic scores for common human  
476 traits. *bioRxiv*, 106062.
- 477 Werner, S., Malaspina, D., & Rabinowitz, J. (2007). Socioeconomic status at birth is  
478 associated with risk of schizophrenia: population-based multilevel study.  
479 *Schizophrenia Bulletin*, 33(6), 1373-1378.
- 480 Whalley, H. C., Adams, M. J., Hall, L., Clarke, T.-K., Fernandez-Pujals, A. M.,  
481 Gibson, J., . . . Davies, G. (2016). Dissection of major depressive disorder  
482 using polygenic risk scores for schizophrenia in two independent cohorts.  
483 *Translational Psychiatry*, 6(11), e938.
- 484 Wray, N. R., Ripke, S., Mattheisen, M., Trzaskowski, M., Byrne, E. M., Abdellaoui,  
485 A., . . . the Major Depressive Disorder Working Group of the Psychiatric  
486 Genomics Consortium. (2018). Genome-wide association analyses identify 44  
487 risk variants and refine the genetic architecture of major depression. *Nature*  
488 *Genetics*, 50(5), 668-681. doi: 10.1038/s41588-018-0090-3



491 **Figure 1.** Mediation model linking genetic influences on educational attainment (EA), used as a proxy for cognitive ability, to depressive symptoms, via  
492 socioeconomic status

493 **1a.** Duke Neurogenetics Study

494

495

496

497

498

499

500

501

502

503

504

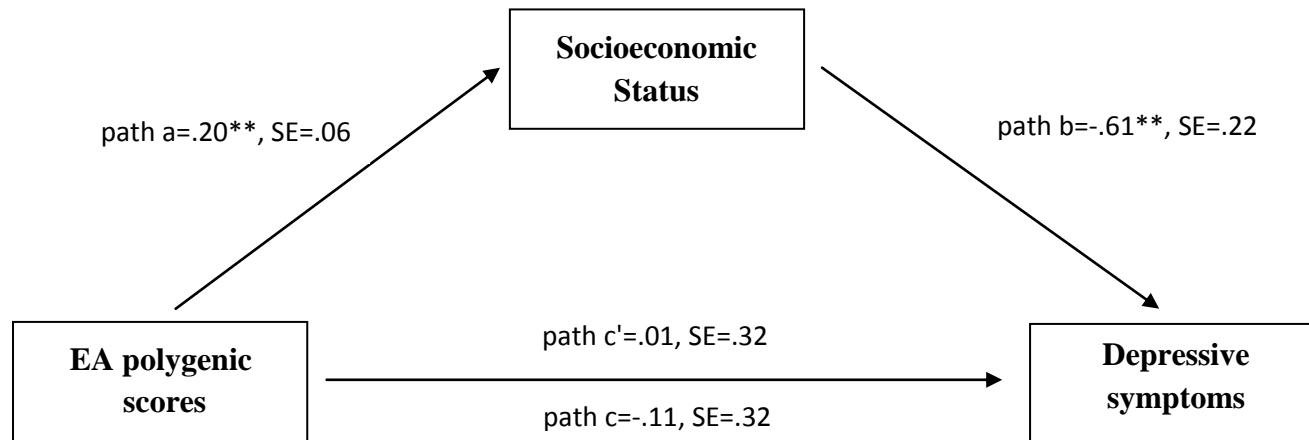

505 **1b. UK Biobank**

506

507

508

509

510

511

512

513

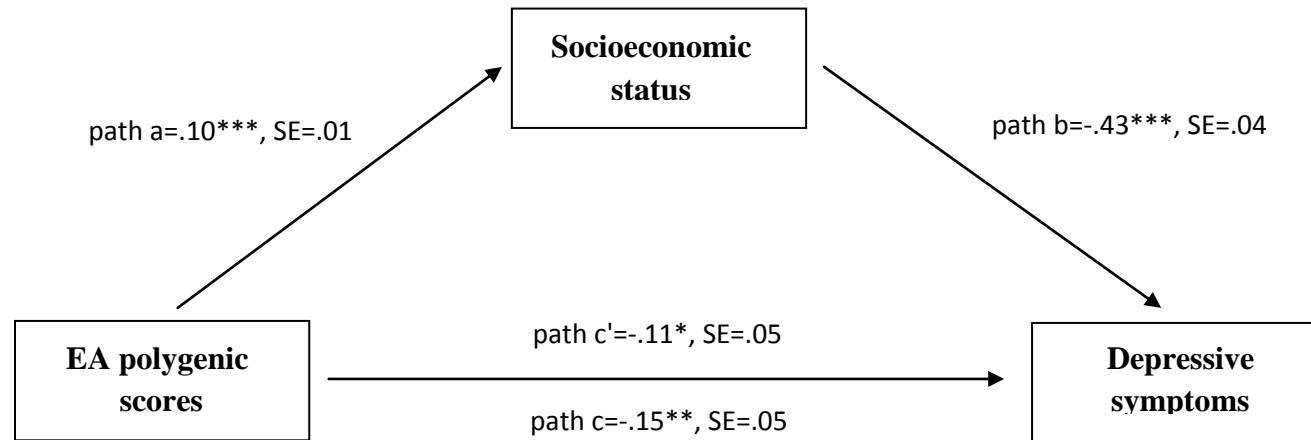

514 Note. \* $p < .05$ , \*\* $p < .01$ , \*\*\* $p < .0001$ . EA - educational attainment. c - the total effect of the EA polygenic scores on depressive symptoms; c'-the effect of EA  
515 polygenic scores on depressive symptoms, while controlling for SES.

516
